# Supplementary material for: The genomic landscape at a late stage of stickleback speciation: High genomic divergence interspersed by small localized regions of introgression
Source: PubMed Central journal article supplement (PMC5988309; doi:10.1371/journal.pgen.1007358), 2018-05-23
Supplement: pgen.1007358.s014.pdf [file pgen.1007358.s014.pdf]

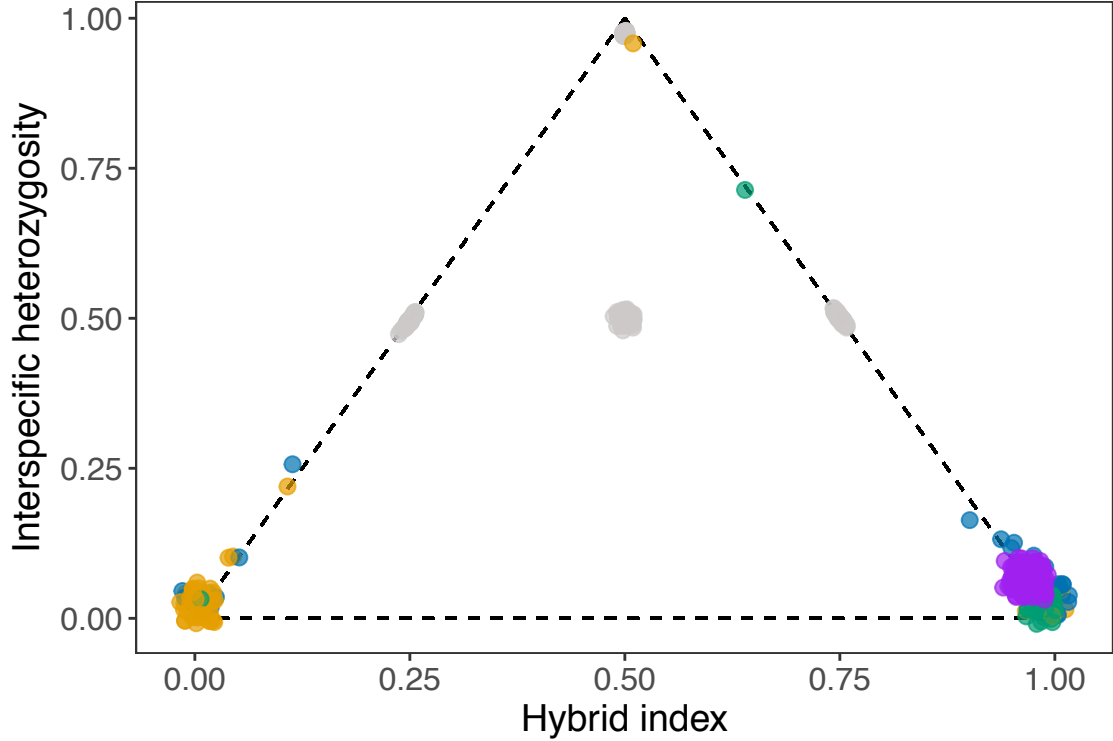

● Atlantic ● Japan Sea ● Pacific Ocean (Japan) ● Pacific Ocean (North America) ● Simulated hybrids
