# Supplementary material for: The genomic landscape at a late stage of stickleback speciation: High genomic divergence interspersed by small localized regions of introgression
Source: PubMed Central journal article supplement (PMC5988309; doi:10.1371/journal.pgen.1007358), 2018-05-23

$D_{\text{FOIL}}$

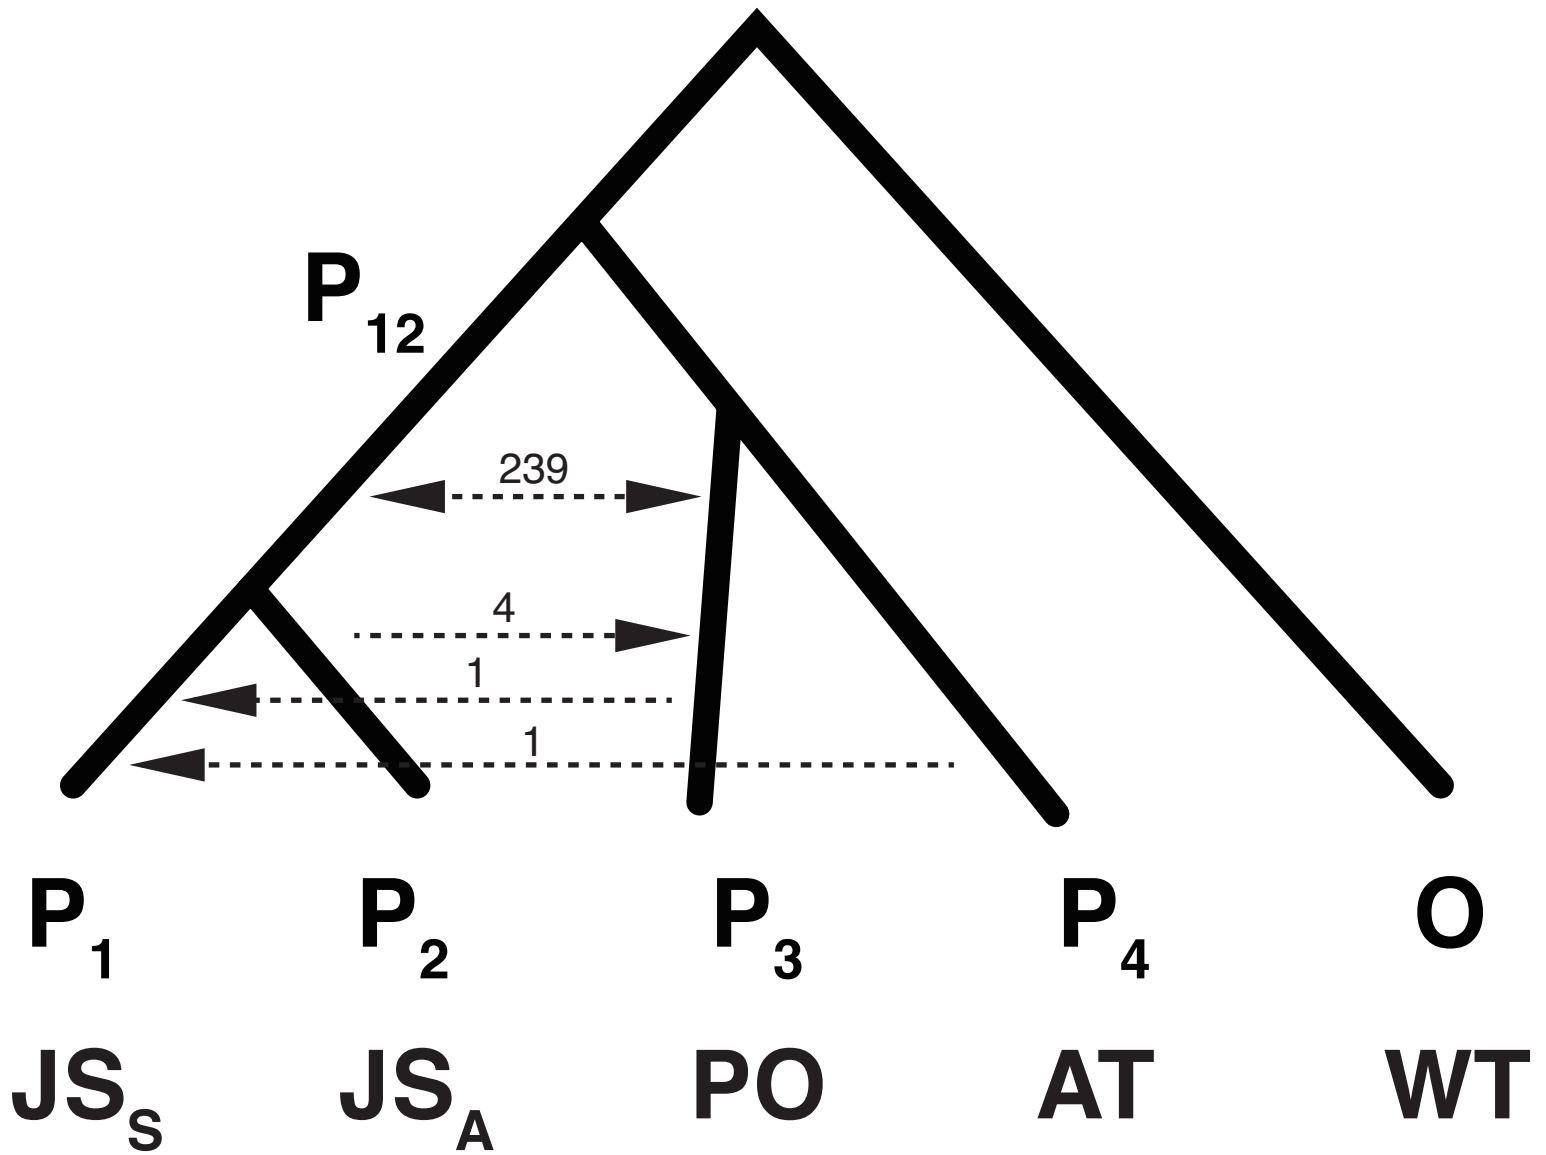

Supplement: pgen.1007358.s023.pdf [file pgen.1007358.s023.pdf]
